# Supplementary material
Source: publisher site journal article supplement (https://www.spandidos-publications.com/8453/downloadSupplementary)
Supplement: Supplementary file 1 [file downloadSupplementary]

Table SI. Escape latency during the acquisition phase of the Morris water maze across training days.

| Group          | Mean escape latency time (sec) |             |            |            |            |
|----------------|--------------------------------|-------------|------------|------------|------------|
|                | Day 1                          | Day 2       | Day 3      | Day 4      | Day 5      |
| Control sham   | 74.22±6.75                     | 41.48±9.91  | 27.30±5.17 | 13.84±2.62 | 8.26±1.13  |
| D-Gal          | 61.12 ±10.98                   | 41.46±9.02  | 22.39±4.68 | 11.01±1.84 | 14.73±4.23 |
| D-Gal + PSO100 | 64.08±12.27                    | 47.65±6.39  | 32.44±7.24 | 17.02±3.09 | 13.80±2.64 |
| D-Gal + PSO500 | 68.06±8.21                     | 37.18±10.68 | 17.99±3.99 | 11.49±2.11 | 9.66±1.18  |
| D-Gal + FO500  | 71.13±5.45                     | 32.54±6.22  | 25.64±4.00 | 14.25±2.27 | 16.20±4.01 |

Data are presented as mean ± SEM. Escape latency decreased progressively across training days in all groups. Two-way repeated measures ANOVA showed a significant effect of day [ $F(2.548, 76.45)=88.15$ ;  $P<0.001$ ], but no significant effect of group [ $F(4, 30)=0.3644$ ;  $P>0.05$ ] or group x day interaction [ $F(10.19, 76.45)=0.6452$ ;  $P>0.05$ ]. D-Gal, D-galactose; PSO100, Perilla seed oil 100 mg/kg; PSO500, Perilla seed oil 500 mg/kg; FO500, fish oil 500 mg/kg.
